# Supplementary material
Source: PubMed Central journal article supplement (PMC5517312)
Supplement: NIHMS851990-supplement-Supplemental_Figure_1.pdf [file NIHMS851990-supplement-Supplemental_Figure_1.pdf]

Supplemental Figure 1. Flow diagram for study inclusion and model Ns

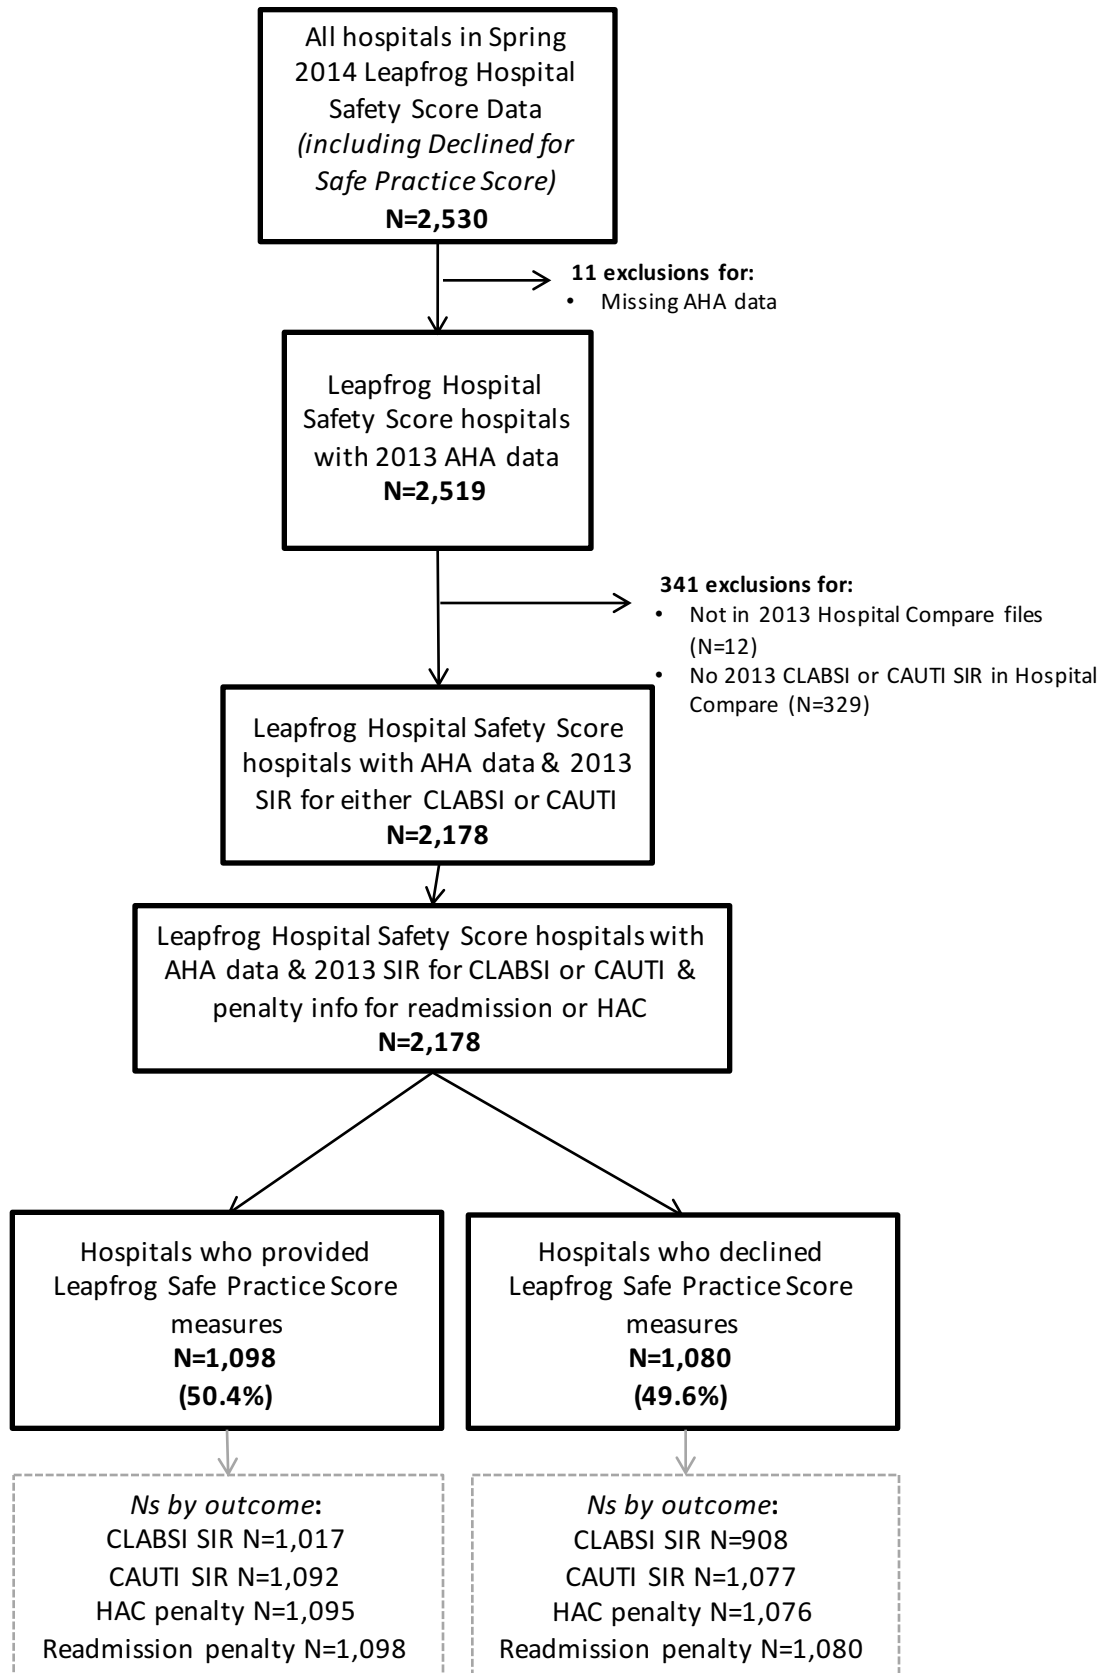

Note: AHA=American Hospital Association; CLABSI=Central line-associated bloodstream infection; CAUTI = Catheter-associated urinary tract infection; SIR=Standardized Infection Rates; HAC=Hospital-acquired condition.
