# Supplementary material
Source: PubMed Central journal article supplement (PMC5517312)
Supplement: NIHMS851990-supplement-Supplemental_Figure_2.pdf [file NIHMS851990-supplement-Supplemental_Figure_2.pdf]

Supplemental Figure 2. Comparison of CLABSI and CAUTI SIRs used in Hospital Safety Score, compared to compulsorily-reported to Hospital Compare, by data source

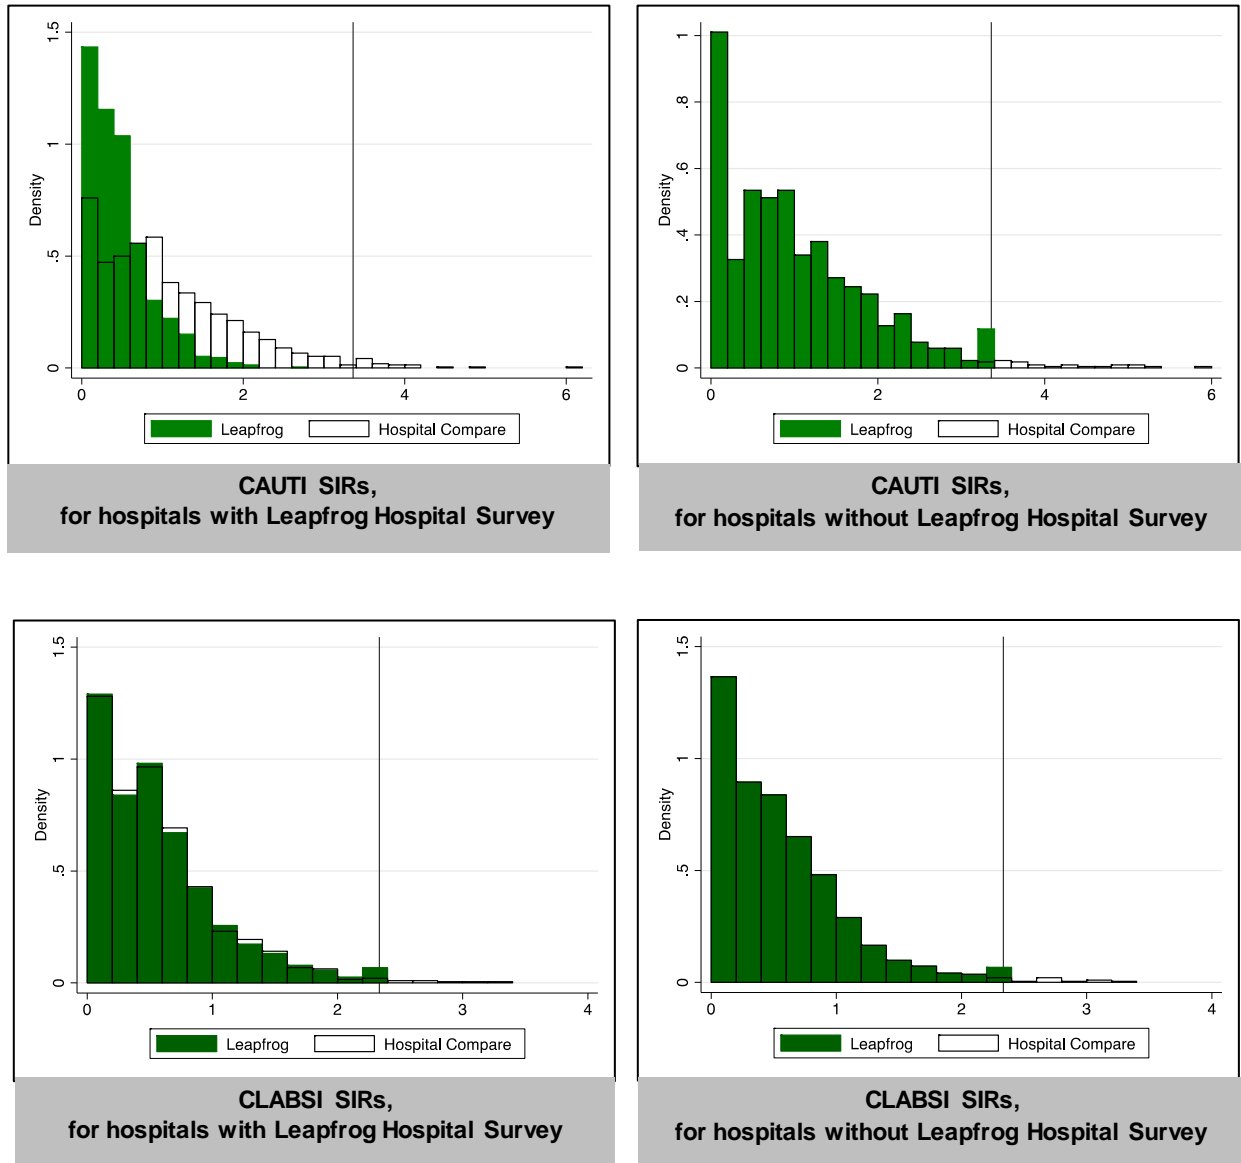

Note: SIR=Standardized Infection Ratio; CLABSI=Central line-associated bloodstream infection; CAUTI=Catheter-associated urinary tract infection. Vertical line on each plot indicates trim point for distribution in Leapfrog Hospital Safety Score methodology.
